# Supplementary material
Source: publisher figshare collection journal article supplement (https://frontiersin.figshare.com/ndownloader/files/26560727)
Supplement: Supplementary file 1 [file 26560727]

**Supplementary Table 3.** ICP-MS analysis: Parameter and Setting

| **Parameter** | **Setting** |
| --- | --- |
| RF-Power (W) | 1500 |
| Carrier gas flow (mL/min) | ≃ l.2 |
| Plasma gas flow (mL/min) | ≃ 15 |
| Auxiliary gas flow (mL/min) | ≃ 1.0 |
| Spray chamber | Water cooled double pass |
| Spray chamber temperature (°C) | ≃ 2 |
| Lens voltage | 4.5 |
| Mass resolution | 0.7 |
| Integration time points/ms | 3 |
| Points per peak | 3 |
